# Supplementary material for: Lanthanide-based bis-(3,5-dicarboxy-phenyl)terephthalamide metal–organic frameworks: slow relaxation of magnetization and detection of trace Fe2+ and Fe3+
Source: Royal Society of Chemistry journal article supplement (doi:10.1039/d1nj00863c), 2021-01-01
Supplement: d1nj00863c1.pdf [file d1nj00863c1.pdf]

## Electronic Supplementary Information

### Lanthanide-based bis-(3,5-dicarboxy-phenyl)terephthalamide metal-organic frameworks: slow relaxation of magnetization and detection of trace Fe<sup>2+</sup> and Fe<sup>3+</sup>

Qingfang Lin, Wen Xie, Zhihui Zong, Zicheng Liu, Yuqing Sun, Lili Liang\*

Department of Chemistry, Bengbu Medical College, Bengbu 233030, P. R. China.

#### Contents:

1. TableS1 Selected Bond Lengths (Å) and Bond Angles (°) in **1-2**.
2. Fig. S1 Powder XRD patterns of **1-2**.
3. Fig. S2 TG-DSC curves of **1-2** under nitrogen.
4. Fig. S3 Solid state fluorescence spectrum of **1-2**.
5. Fig. S4 SV plot of (a) **1** and (b) **2** by gradual addition of Fe<sup>2+</sup>
6. Fig. S5 Temperature dependence of the in-phase ( $\chi_M'$ ) ac susceptibility components measured at different frequencies for compound **1** at zero dc field and an oscillation of 2.5 Oe.
7. Fig. S6 Temperature dependence of the out-of-phase ( $\chi_M''$ ) ac susceptibility components measured at different frequencies for compound **1** at zero dc field and an oscillation of 2.5 Oe.
8. Fig. S7 Field dependence of the out-of-phase ( $\chi_M''$ ) ac susceptibility components measured for compound **1** at 2 K from 0 Oe to 5000 Oe.
9. Fig. S8 Frequency dependence of the in-phase ( $\chi_M'$ ) ac susceptibility components measured for compound **1** at 1000 Oe.
10. Fig. S9 Cole-Cole plots for **1**

Table S1 Selected bond lengths (Å) and bond angles (°) in **1-2**

| 1           |            |              |            |              |            |
|-------------|------------|--------------|------------|--------------|------------|
| Dy1-O2      | 2.445(9)   | Dy1-O1       | 2.395(9)   | Dy1-O9       | 2.299(12)  |
| Dy1-O10     | 2.450(8)   | Dy1-O11      | 2.367(9)   | Dy1-O8       | 2.345(14)  |
| Dy1-O19     | 2.302(9)   | Dy1-O18      | 2.257(8)   | Dy2-O5       | 2.384(7)   |
| Dy2-O4      | 2.292(8)   | Dy2-O12      | 2.306(7)   | Dy2-O13      | 2.332(8)   |
| Dy2-O21     | 2.423(8)   | Dy2-O20      | 2.419(8)   | Dy2-O6       | 2.409(10)  |
| Dy2-O7      | 2.417(10)  |              |            |              |            |
| O2-Dy1-O10  | 124.7(3)   | O1-Dy1-O2    | 52.9(3)    | O1-Dy1-O10   | 72.1(3)    |
| O9-Dy1-O1   | 81.6(4)    | O9-Dy1-O2    | 87.9(4)    | O9-Dy1-O10   | 77.9(4)    |
| O9-Dy1-O11  | 131.3(4)   | O9-Dy1-O8    | 76.1(5)    | O9-Dy1-O19   | 151.7(4)   |
| O11-Dy1-O2  | 114.7(4)   | O11-Dy1-O1   | 80.0(4)    | O11-Dy1-O10  | 53.6(3)    |
| O8-Dy1-O2   | 76.8(4)    | O8-Dy1-O1    | 125.4(4)   | O8-Dy1-O10   | 145.3(4)   |
| O8-Dy1-O11  | 148.3(4)   | O19-Dy1-O2   | 80.3(3)    | O19-Dy1-O1   | 110.2(4)   |
| O19-Dy1-O10 | 129.8(3)   | O19-Dy1-O11  | 76.9(3)    | O19-Dy1-O8   | 76.3(5)    |
| O18-Dy1-O2  | 156.0(3)   | O18-Dy1-O1   | 149.6(3)   | O18-Dy1-O9   | 88.9(4)    |
| O18-Dy1-O10 | 77.6(3)    | O18-Dy1-O11  | 84.9(4)    | O18-Dy1-O8   | 79.3(4)    |
| O18-Dy1-O19 | 91.7(3)    | O5-Dy2-O21   | 88.5(3)    | O5-Dy2-O20   | 136.3(3)   |
| O5-Dy2-O6   | 73.3(3)    | O5-Dy2-O7    | 139.4(3)   | O4-Dy2-O5    | 124.5(3)   |
| O4-Dy2-O12  | 76.5(3)    | O4-Dy2-O13   | 79.7(3)    | O4-Dy2-O21   | 133.9(3)   |
| O4-Dy2-O20  | 81.8(3)    | O4-Dy2-O6    | 142.2(3)   | O4-Dy2-O7    | 79.8(3)    |
| O12-Dy2-O5  | 77.5(3)    | O12-Dy2-O13  | 123.5(3)   | O12-Dy2-O21  | 147.8(3)   |
| O12-Dy2-O20 | 146.1(3)   | O12-Dy2-O6   | 75.9(3)    | O12-Dy2-O7   | 78.0(3)    |
| O13-Dy2-O5  | 75.4(3)    | O13-Dy2-O21  | 79.1(3)    | O13-Dy2-O20  | 76.6(3)    |
| O13-Dy2-O6  | 137.7(3)   | O13-Dy2-O7   | 145.1(3)   | O20-Dy2-O21  | 53.6(3)    |
| O6-Dy2-O21  | 72.4(3)    | O6-Dy2-O20   | 108.5(3)   | O6-Dy2-O7    | 69.6(4)    |
| O6-Dy2-O21  | 95.5(3)    | O6-Dy2-O20   | 72.7(3)    |              |            |
| 2           |            |              |            |              |            |
| Sm2-O6      | 2.394(2)   | Sm2-O5       | 2.314(2)   | Sm2-O7       | 2.450(2)   |
| Sm2-O12     | 2.337(3)   | Sm2-O13      | 2.380(3)   | Sm2-O8       | 2.444(2)   |
| Sm2-O20     | 2.443(5)   | Sm2-O19      | 2.430(3)   | Sm2-O20A     | 2.400(5)   |
| Sm1-O14     | 2.486(3)   | Sm1 O17      | 2.305(3)   | Sm1 O18      | 2.302(3)   |
| Sm1-O15     | 2.394(3)   | Sm1-O1       | 2.467(3)   | Sm1-O21      | 2.364(2)   |
| Sm1-O2      | 2.424(3)   | Sm1-O22      | 2.327(3)   | Sm1-O21A     | 2.363(3)   |
| Sm1-O2      | 2.424(3)   | Sm1-O22      | 2.327(3)   | Sm1-O21A     | 2.363(3)   |
| O6-Sm2-O7   | 88.86(8)   | O6-Sm2-O8    | 136.07(8)  | O6-Sm2-O20   | 72.35(9)   |
| O6-Sm2-O19  | 140.12(11) | O6-Sm2-O20A  | 74.10(10)  | O5-Sm2-O6    | 123.72(9)  |
| O5-Sm2-O7   | 133.81(9)  | O5-Sm2-O12   | 76.91(9)   | O5-Sm2-O13   | 79.37(9)   |
| O5-Sm2-O8   | 82.14(9)   | O5-Sm2-O20   | 143.62(10) | O5-Sm2-O19   | 79.99(11)  |
| O5-Sm2-O20A | 142.57(12) | O12-Sm2-O6   | 77.68(9)   | O12-Sm2-O7   | 147.43(9)  |
| O12-Sm2-O13 | 123.88(9)  | O12-Sm2-O8   | 146.21(8)  | O12-Sm2-O20  | 75.58(8)   |
| O12-Sm2-O19 | 77.87(10)  | O12-Sm2-O20A | 75.77(9)   | O13-Sm2-O6   | 74.80(9)   |
| O13-Sm2-O7  | 79.35(9)   | O13-Sm2-O8   | 76.78(9)   | O13-Sm2-O20  | 136.34(10) |
| O13-Sm2-O19 | 144.94(10) | O13-Sm2-O20A | 137.65(12) | O8-Sm2-O7    | 53.21(8)   |
| O20-Sm2-O7  | 72.09(9)   | O20-Sm2-O8   | 109.06(8)  | O19-Sm2-O7   | 95.22(10)  |
| O19-Sm2-O8  | 72.56(10)  | O19-Sm2-O20  | 71.33(11)  | O20A-Sm2-O7  | 72.03(10)  |
| O20A-Sm2-O8 | 107.90(8)  | O20A-Sm2-O19 | 69.64(12)  | O17-Sm1-O14  | 79.00(9)   |
| O17-Sm1-O15 | 85.54(12)  | O17-Sm1-O1   | 156.09(11) | O17-Sm1-O21  | 91.21(8)   |
| O17-Sm1-O2  | 150.49(11) | O17-Sm1-O22  | 80.29(13)  | O17-Sm1-O21A | 85.82(9)   |
| O18-Sm1-O14 | 130.36(10) | O18-Sm1-O17  | 89.72(10)  | O18-Sm1-O15  | 78.22(11)  |
| O18-Sm1-O1  | 80.16(10)  | O18-Sm1-O21  | 151.38(9)  | O18-Sm1-O2   | 112.16(12) |
| O18-Sm1-O22 | 74.35(14)  | O18-Sm1-O21A | 148.48(11) | O15-Sm1-O14  | 52.99(9)   |
| O15-Sm1-O1  | 113.07(12) | O15-Sm1-O2   | 80.20(12)  | O1-Sm1-O14   | 123.87(10) |
| O21-Sm1-O14 | 77.73(7)   | O21-Sm1-O15  | 130.36(8)  | O21-Sm1-O1   | 87.69(8)   |
| O21-Sm1-O2  | 78.94(10)  | O2-Sm1-O14   | 71.76(10)  | O2-Sm1-O1    | 52.22(11)  |
| O22-Sm1-O14 | 147.25(12) | O22-Sm1-O15  | 149.04(13) | O22-Sm1-O1   | 76.14(14)  |
| O22-Sm1-O21 | 77.63(11)  | O22-Sm1-O2   | 123.51(13) | O22-Sm1-O21A | 74.14(13)  |

O21A-Sm1-O14 79.29(9) O21A-Sm1-O15 132.28(10) O21A-Sm1-O1 91.56(9)  
O21A-Sm1-O2 84.93(11)

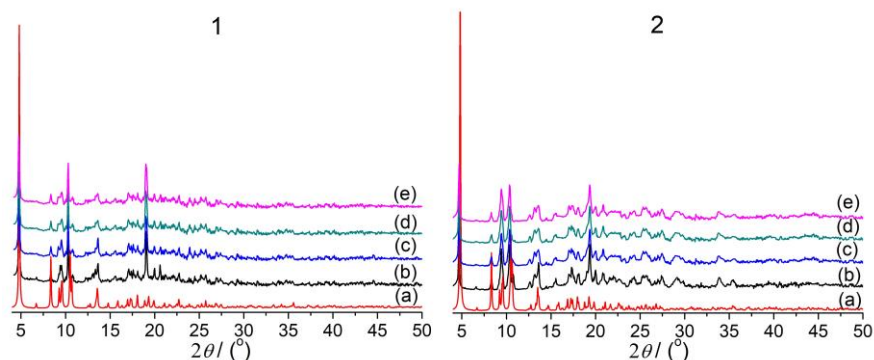

**Fig. S1** Powder XRD patterns for **1** and **2**: (a) simulated, (b) synthesized, (c) after soaked in DMF, (d) after soaked in water, (e) after soaked in aqueous solution of  $\text{Fe}^{2+}$  and  $\text{Fe}^{3+}$ .

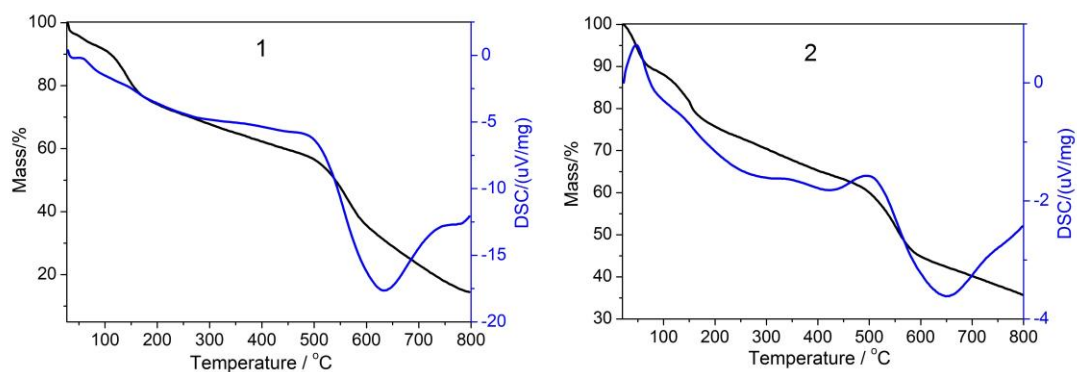

**Fig. S2** TGA-DSC curves of **1** and **2** under nitrogen

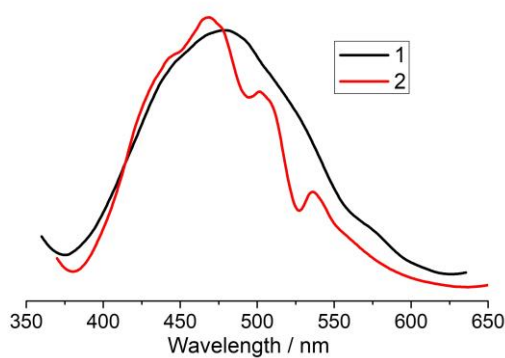

**Fig. S3** Solid state fluorescence spectrum of **1** and **2**

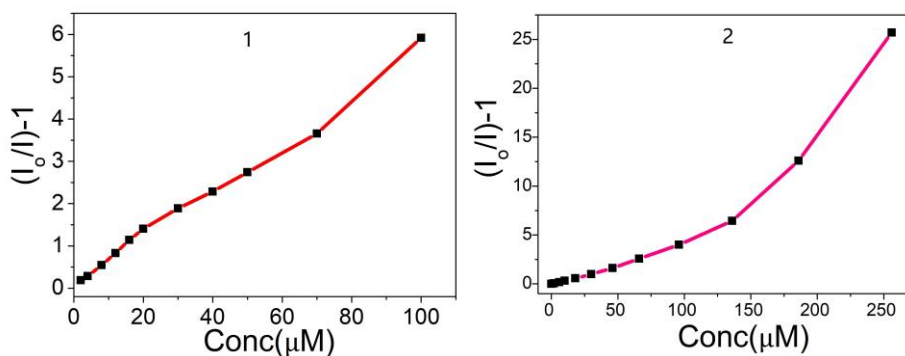

**Fig. S4** (a) SV plot of (a) **1** and (b) **2** by gradual addition of  $\text{Fe}^{2+}$  (0 – 250  $\mu\text{M}$ ) in DMF

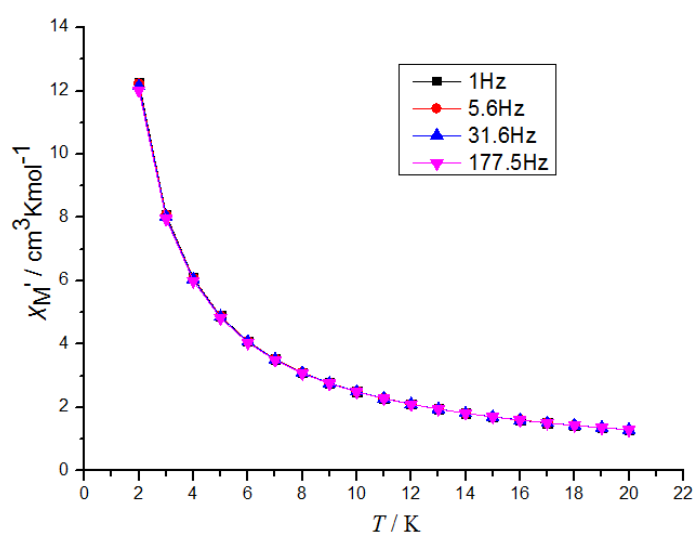

**Fig. S5** Temperature dependence of the in-phase ( $\chi_M'$ ) ac susceptibility components measured at different frequencies for compound **1** at zero dc field and an oscillation of 2.5 Oe.

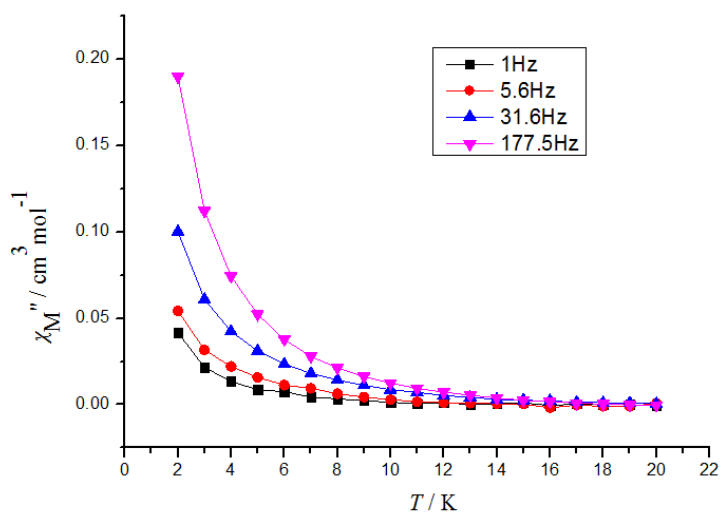

**Fig. S6** Temperature dependence of the out-of-phase ( $\chi_M''$ ) ac susceptibility components measured at different frequencies for compound **1** at zero dc field and an oscillation of 2.5 Oe.

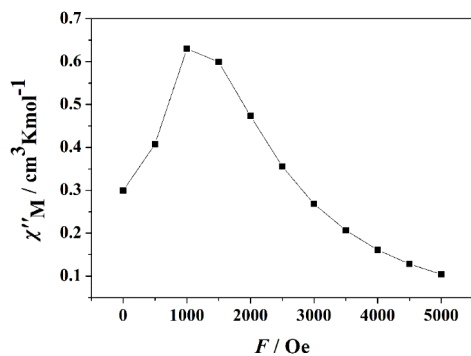

**Fig. S7** Field dependence of the out-of-phase ( $\chi''_M$ ) ac susceptibility components measured for compound **1** at 2 K from 0 Oe to 5000 Oe.

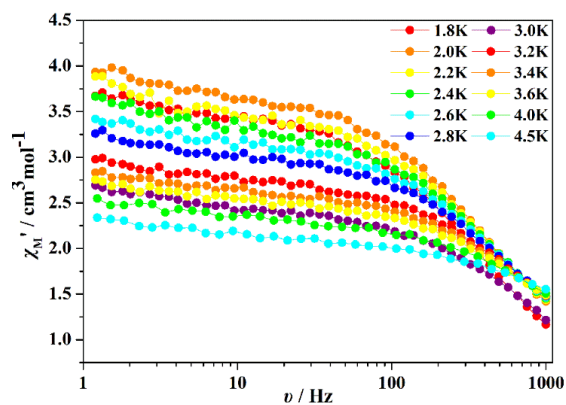

**Fig. S8** Frequency dependence of the in-phase ( $\chi'_M$ ) ac susceptibility components measured for compound **1** at 1000 Oe.

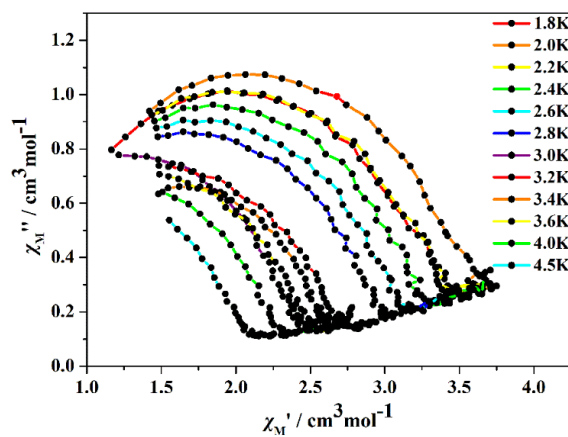

**Fig. S9** Cole-Cole plots for **1**
